# Supplementary material
Source: publisher figshare collection journal article supplement (https://rs.figshare.com/ndownloader/files/15176237)
Supplement: Supplementary file 1 [file 15176237]

# Adaptive Phenotypic Plasticity for Lif- History and Less Fitness-Related Traits

Cristina Acasuso-Rivero<sup>1,2</sup>, Courtney J. Murren<sup>3</sup>, Carl D. Schlichting<sup>4</sup>, Ulrich K. Steiner<sup>1,5</sup>

<sup>1</sup>INSERM U1001, Université Paris Descartes, Sorbonne Paris Cité, Faculté Cochin, 75014 Paris, France

<sup>2</sup>Current address: Department of Veterinary Medicine, University of Cambridge;

<sup>3</sup>Department of Biology, College of Charleston, Charleston SC 29424

<sup>4</sup>Department of Ecology and Evolutionary Biology, University of Connecticut, Storrs, CT 06269

<sup>5</sup>Department of Biology, Center of Population Dynamics, University of Southern Denmark, 5230 Odense, Denmark

DOI: 10.1098/rspb.2019.0653

---

## SUPPLEMENTARY MATERIALS

---

### Supplementary Material 1: CATEGORIES

#### A) REPORTED CATEGORIES

From all the reported species, 173 were animals: 74 vertebrates, mostly amphibians (51 spp.), 12 reptiles, 11 bony fishes, 2 mammals. The data includes 77 species of arthropods, mainly insects (62 spp.) and crustaceans (13 spp.) There are only a short number of studies performed on plasticity due to interaction between members of the same species (intraspecific), photoperiods (5% each) or intrinsic resources (0.1%).

We merged the phyla *Annelida*, *Arthropoda*, *Bryozoa*, *Ciliophora*, *Cnidaria*, *Echinodermata*, *Mollusca* and *Nematoda* into *Invertebrates* and named the classification *Taxa* which consisted of *Chordates*, *Invertebrates*, *Flowering Plants* and *Green Algae*. We constructed a hierarchical model including: species/genus/class/phylum/*Taxa* as fix effects. We then compared the models discarding the lowest classification each step and found no difference in the AIC between models. Thus, the CV<sub>E</sub> of eukaryotes will differ between high taxa, regardless of the lower taxonomic orders.

**Table S1:** Information collected from each study.

| Variable                               | Description or categorisation                                                                                                                                                                                                                                                                                                                                                                                                                                                                                                                                                                                         |
|----------------------------------------|-----------------------------------------------------------------------------------------------------------------------------------------------------------------------------------------------------------------------------------------------------------------------------------------------------------------------------------------------------------------------------------------------------------------------------------------------------------------------------------------------------------------------------------------------------------------------------------------------------------------------|
| Reference                              | Code                                                                                                                                                                                                                                                                                                                                                                                                                                                                                                                                                                                                                  |
| Year of publication                    | 1987-2011                                                                                                                                                                                                                                                                                                                                                                                                                                                                                                                                                                                                             |
| Species                                | Genus and species reported by authors.                                                                                                                                                                                                                                                                                                                                                                                                                                                                                                                                                                                |
| Phylum (Classes)                       | According to NCBI taxonomy [44]: 1) Annelida [ <i>Polychaeta</i> ]. 2) Arthropoda [ <i>Arachnida</i> , <i>Collembola</i> , <i>Crustacea</i> , <i>Insecta</i> ]. 3) Bryozoa [ <i>Gymnolaemata</i> ]. 4) Chlorophyta [ <i>Chlorophyta</i> ]. 5) Chordata [ <i>Actinopterygii</i> , <i>Amphibia</i> , <i>Mammalia</i> , <i>Sauropsida</i> ]. 6) Ciliophora [ <i>Spirotrichea</i> ]. 7) Cnidaria [ <i>Anthozoa</i> ]. 8) Echinodermata [ <i>Ophiurida</i> ]. 9) Magnoliophyta [ <i>Eudicotyledons</i> , <i>Liliopsida</i> , <i>Magnoliids</i> ]. 10) Mollusca [ <i>Gastropoda</i> ]. 11) Nematoda [ <i>Chromadorea</i> ]. |
| Population                             | Subspecies or distinct populations of one same species reported in one study.                                                                                                                                                                                                                                                                                                                                                                                                                                                                                                                                         |
| Number of environments                 | Number of the differential environments into which a single genotype was subjected.                                                                                                                                                                                                                                                                                                                                                                                                                                                                                                                                   |
| Environment type                       | 1) Environment Quality. 2) Interspecific Interactions. 3) Intraspecific Interactions 4) Intrinsic Resources. 5) Photoperiods and Light 6) Temperature.                                                                                                                                                                                                                                                                                                                                                                                                                                                                |
| Location of the experiment             | 1) Field. 2) Pseudo-controlled. 3) Controlled conditions. 4) Both (controlled and field).                                                                                                                                                                                                                                                                                                                                                                                                                                                                                                                             |
| Breeding                               | Breeding conditions:<br>1) Wild. 2) Controlled. 3) Both.                                                                                                                                                                                                                                                                                                                                                                                                                                                                                                                                                              |
| Trait type                             | We classified trait types into 6 categories and 46 sub-categories [see Supplementary material 1 for sub-categories]:<br><u>Non-fitness traits</u> : 1) Behavioural. 2) Morphological. 3) Metabolism & Physiology. 4) Developmental.<br><u>Fitness traits</u> : 1) Reproductive. 2) Survivorship.                                                                                                                                                                                                                                                                                                                      |
| Sample size (N)                        | Number of independent units.                                                                                                                                                                                                                                                                                                                                                                                                                                                                                                                                                                                          |
| Kind of traits for an individual study | If the authors reported within a single paper: 1: Only fitness traits. 2: Only non-fitness traits. 3: Both.                                                                                                                                                                                                                                                                                                                                                                                                                                                                                                           |
| Repetitions                            | Number of times that the same species [at different times or distinctive populations] was subjected to the same differential environments and recorded the same trait. Each report within a single study was collected separately and weighted for the number of repetitions.                                                                                                                                                                                                                                                                                                                                         |

**Table S2:** Summary of the sample sizes (N) from the data set analysed.

| <b>Taxa</b>             | <b>Environment type</b>            | <b>Location</b>               | <b>Breeding</b>               | <b>Trait type</b>              | <b>Repetitions</b> | <b>N</b>     |
|-------------------------|------------------------------------|-------------------------------|-------------------------------|--------------------------------|--------------------|--------------|
| Invertebrates<br>3453   | Interspecific interactions<br>2351 | Controlled conditions<br>4889 | Controlled conditions<br>2768 | Morphological<br>2740          | Min.<br>1          | Min.<br>2    |
| Chordates<br>2001       | Environment quality<br>1787        | Pseudo-captive<br>561         | Wild<br>1611                  | Reproductive<br>1280           | Max.<br>60         | Max.<br>2110 |
| Flowering Plants<br>364 | Temperature<br>1115                | Field<br>296                  | Both<br>1486                  | Behavioural<br>640             |                    |              |
| Green Algae<br>67       | Intraspecific interactions<br>321  | Both<br>139                   | Unknown<br>20                 | Developmental<br>595           |                    |              |
|                         | Photoperiods & light<br>305        |                               |                               | Metabolism & Physiology<br>385 |                    |              |
|                         | Intrinsic resources<br>6           |                               |                               | Survivorship<br>245            |                    |              |

## B) CATEGORISATION OF TRAIT SUB-TYPES

**Behavioural:** Activity, Alertness, Attack, Avoidance, Distance to conspecifics, Foraging, Mating, Phototaxis, Self-care, Settling and Speed.

**Morphological:** Colour, Extended phenotype, Growth rate, Mass, Mass of an organ, Number of organs, Shape, Size and Size of an organ.

**Metabolism & Physiology:** Chemical, Enzymatic, Immunological, Metabolic activity, Resistance and Resources.

**Developmental:** Abnormalities, Development rate, Growth rate, Sex ratio, Stages and Time.

**Reproductive:** Fecundity, Reproductive investment, Mass of reproductive organ, Number of eggs, Number of reproductive organs, Offspring mass, Offspring size, Offspring survival, Offspring volume, Population size or growth, Reproductive time, Size of reproductive organ of offspring, Size of reproductive organ and Volume of reproductive organ.

**Survivorship:** Survival, Number of surviving adults, juveniles or clutches, Adult Longevity, Life span, Offspring eaten by predators, Age of dead and Cumulative mortality.

## C) MAIN SUB-CATEGORIES OF THE ENVIRONMENTS

**Environment Quality:** Oxygen, food availability, hydration, salinity, flying stress, humidity, depth, toxic substances in the environment, deforestation, water flow, prey size, fertilization.

**Photoperiods and Light:** Diapause, circadian cycles, day light duration, light availability and photo-phases.

**Temperature:** Chilling /no chilling and temperature gradients.

**Intraspecific Interactions:** Density, conspecifics presence (e.g. raised with only females) and mating.

**Interspecific Interactions:** Predators and predator cues, symbionts, parasites and parasitoids.

**Intrinsic Resources:** Autonomy.

## Supplementary Material 2: ASSESSING PUBLICATION BIAS

Funnel plot illustrating absence of publication bias by the symmetry of the graph and by the association between the size of the effect and the variances [1]. Note, that many of the data points plotted are already means, because they are extracted from studies that reported plasticity and, in such studies genotypes, or treatment groups are only reported as means.

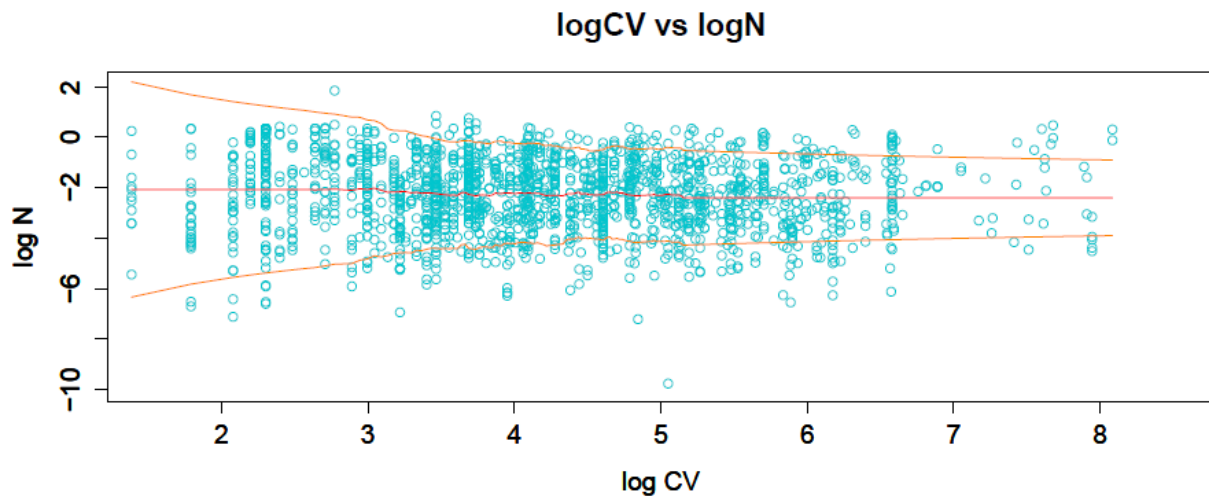

**Figure S1:** Funnel plot from all published data collected from 1987-2011.

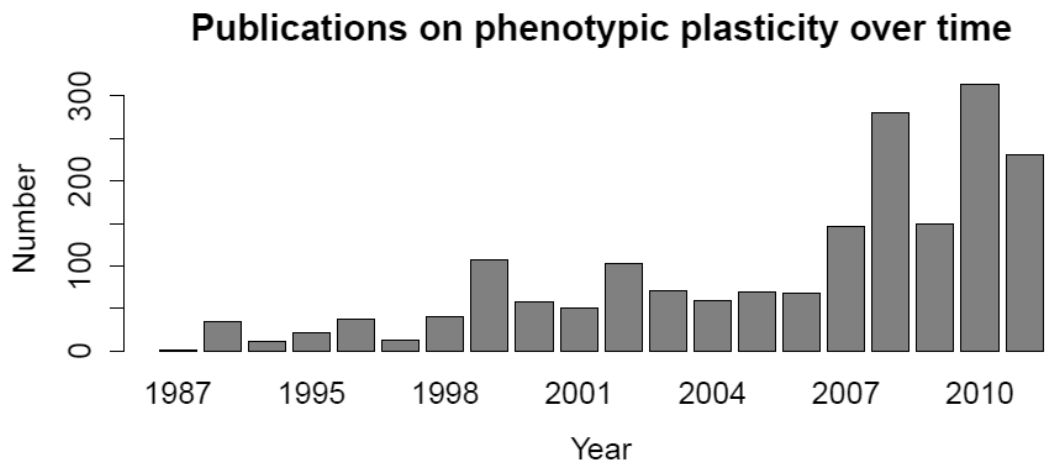

**Figure S2:** Histogram showing the increase on the publications on phenotypic plasticity over years.

1. Egger M, Smith GD, Schneider M, Minder C. 1997 Bias in meta-analysis detected by a simple, graphical test. *BMJ* **315**, 629–634. (doi:10.1136/bmj.315.7109.629)

**Supplementary Material 3: REPRESENTATION OF THE MEAN VALUES OF THE CV FOR TRAIT TYPES, ENVIRONMENTS AND TAXA**

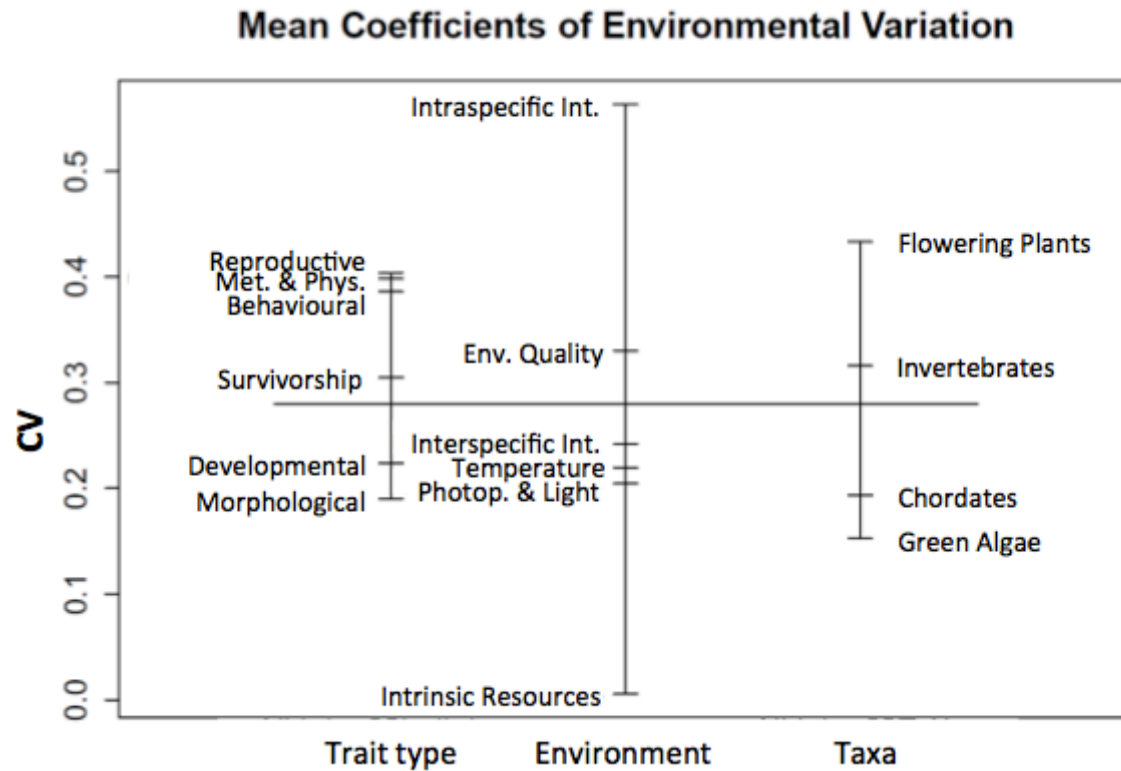

**Figure S3:** Mean coefficients of variation from trait types, environment types and taxa.

#### Supplementary Material 4: EVALUATION OF THE MODELS' RESIDUALS

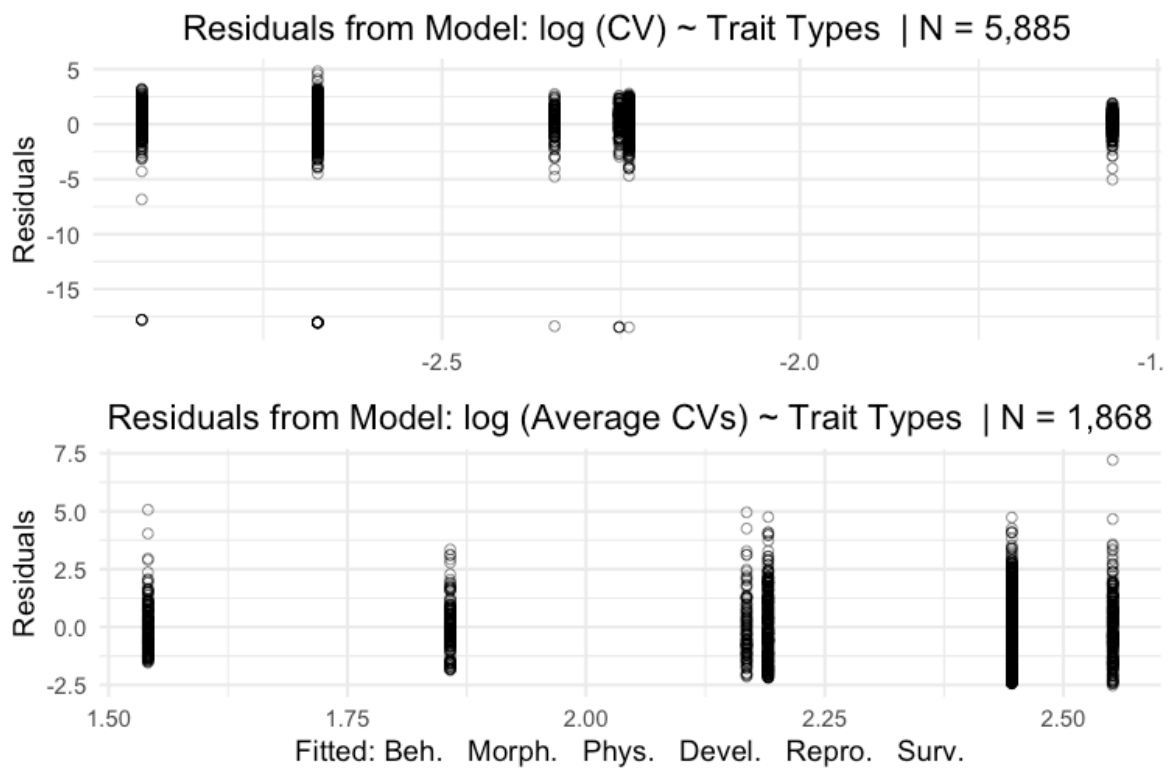

**Figure S4:** Residuals from the selected models including only the trait types. **Upper panel:** Residuals from the fitted model using the data from the original data set. **Lower panel:** illustrates the residuals from the fitted model using the averages of the CVs.

## Supplementary Material 5: WHEN EXCLUDING PLANTS FROM THE ANALYSES TAXA BECOMES LITTLE INFLUENTIAL

**Table S3:** Competing linear models excluding all plant data and selected based on AIC. Models used as response variable the log transformed Coefficient of Variation (scaled plasticity) and explored combinations of trait type, environment and taxa as fixed effects. Reference study was included as a random effect and repetitions (sample size) as a weighting factor.

| No plants         | Model                           | AIC      | $\Delta$ AIC |
|-------------------|---------------------------------|----------|--------------|
| <b>Null Model</b> | Intercept only                  | 20534.15 | 2851.6       |
| <b>1</b>          | Trait type                      | 17810.87 | 128.32       |
| <b>2</b>          | Environment                     | 18178.27 | 495.72       |
| <b>3</b>          | Taxa                            | 18205.81 | 523.26       |
| <b>4</b>          | Trait type + Environment        | 17778.17 | 95.62        |
| <b>5</b>          | Trait type + Taxa               | 17810.00 | 127.45       |
| <b>6</b>          | Trait type * Environment        | 17682.23 | -0.32        |
| <b>7</b>          | Trait type * Taxa               | 17802.33 | 119.78       |
| <b>8</b>          | Trait type + Environment + Taxa | 17777.32 | 94.77        |
| <b>9</b>          | Trait type * Environment + Taxa | 17682.55 | 0            |



## Supplementary Material 6: NO INDICATION OF TRADE-OFFS BETWEEN LIFE-HISTORY TRAITS

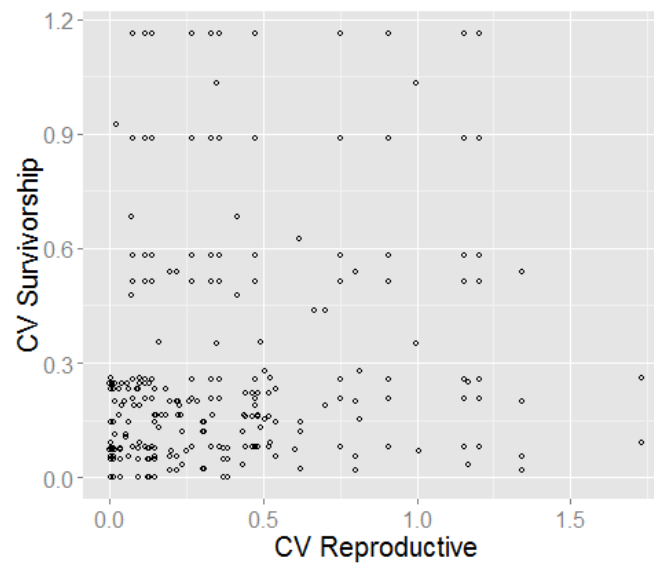

**Figure S5:** Correlation between the CV of reproductive traits and survivorship.

The correlation in Fig. S5 is based on 112 studies that include at least one reproductive trait and one life history trait. Data points represent 254 comparisons between the CV of reproduction and survival within a study. No negative correlation in plasticity between reproduction and survival is observed.
